# Supplementary material
Source: Springer Nature journal article supplement (http://www.springermedizin.de/resource/supplementary/12986_2011_332_MOESM1_ESM.pdf/25655852)

**Serum selenium levels ( $\mu\text{g/l}$ )**

200  
100

**T0**

**T1**

□ BNG  
■ PG

\*

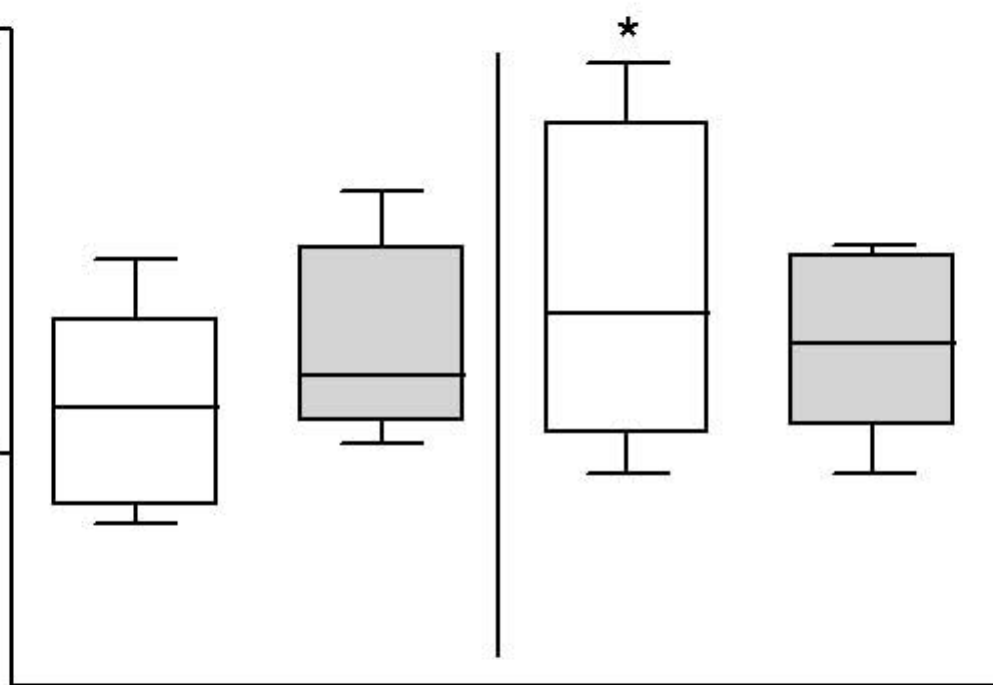

Supplement: MOESM1 [file 25655852]
